# Supplementary material for: Fluorinated MXenes accelerate the hydrogen evolution activity of in situ induced snowflake-like nano-Pt
Source: Royal Society of Chemistry journal article supplement (doi:10.1039/d2ta09698f), 2023-01-01
Supplement: d2ta09698f1.pdf [file d2ta09698f1.pdf]

## Electronic Supplementary Information for

### Fluorinated MXene Accelerates the Hydrogen Evolution Activity of *in-situ* Induced Snowflake-like Nano-Pt

*Xue Zhao,<sup>\*a,||</sup> Mengshan Chen,<sup>b,||</sup> Yingtang Zhou,<sup>\*b</sup> Haibo Zhang,<sup>\*c</sup> and Guangzhi Hu<sup>\*d</sup>*

<sup>a</sup>Faculty of chemistry and chemical engineering, Yunnan Normal University, Kunming 650092, China

<sup>b</sup>National Engineering Research Center for Marine Aquaculture, Marine Science and Technology College, Zhejiang Ocean University, Zhoushan 316004, China

<sup>c</sup>College of Chemistry and Molecular Sciences, Wuhan University, Wuhan 430072, China

<sup>d</sup>Institute for Ecological Research and Pollution Control of Plateau Lakes, School of Ecology and Environmental Science, Yunnan University, Kunming 650504, China

<sup>||</sup>These authors contributed equally

\*The corresponding author Email: [xuezhao0208@gmail.com](mailto:xuezhao0208@gmail.com) (Dr. X. Zhao); [zhouyingtang@zjou.edu.cn](mailto:zhouyingtang@zjou.edu.cn) (Prof. Y. T. Zhou); [haibozhang1980@gmail.com](mailto:haibozhang1980@gmail.com) (Prof. H. Zhang); [guangzhihu@ynu.edu.cn](mailto:guangzhihu@ynu.edu.cn) (Prof. G. Hu)

**Characterization Method Details**

The powder X-ray diffraction signal was collected on the X-ray powder diffractometer (Rigaku, Japan) at a scanning speed of 5°/min, where Cu K $\alpha$  is the excitation source. Specifically, the material was evenly spread in the groove on the quartz sample stage, and then the surface of the material were flattened with a glass slide and placed in an X-ray powder diffractometer to collect XRD signals with a working voltage of 40 kV and a current of 40 A.

The X-ray photoelectron spectroscopy (XPS) signal was collected by X-ray photoelectron spectrometer (Thermo Scientific K-Alpha), and the binding energy of the final signal was corrected by standard C (284.8 eV). Among them, the entire acquisition process was completed in a near-vacuum chamber with a working voltage of 12 kV, a filament current of 6 mA, and an excitation source of Al K $\alpha$  ray (0.6 eV).

Field emission scanning electron microscope (SEM, the instrument model is ZEISS SIGMA) and transmission electron microscope (TEM, the instrument model is Titan G260-300) were used to observe the microstructure of materials. When collecting SEM images, the material were directly covered on the surface of the conductive adhesive pasted on the sample stage, the vacuum degree of the instrument reaches  $5 \times 10^{-5}$  mbar, the working voltage was 3 kV, and the signal acquisition mode is InLens. When collecting TEM images, the material were directly dispersed (ultrasound for 10 min) to form a suspension in ethanol solution, and then dropped onto the ultra-thin micro-grid support film. The operating voltage of the TEM instrument was 300 kV.

The Zeta potential of the material was determined by a Zeta potentiometer (model is Malvern Zetasizer Nano ZS). Among them, the material was directly dispersed in 5 mL ultrapure water (sonicated for 30 min), and then placed in a Zeta potentiometer to collect Zeta signals.

Inductively coupled plasma emission spectrometer was used to detect the exact Pt content in the material, where the loadings of Pt in MXene/B-Pt and Pt/C are 3.35 wt% and 20.00 wt%, respectively. The test details are as follows:

The sample was dispersed in 100 mL of aqua regia, and after ultrasonic treatment for 30 min, it was left to stand for 24 h to convert all the Pt species in the sample into water-soluble ionic states. After diluting by a certain factor, the signal was collected on the ICP-OES instrument, and the accurate loading amount of Pt was obtained by the standard curve interpolation method.

**Note:** The above characterization methods are all ex-situ tests.

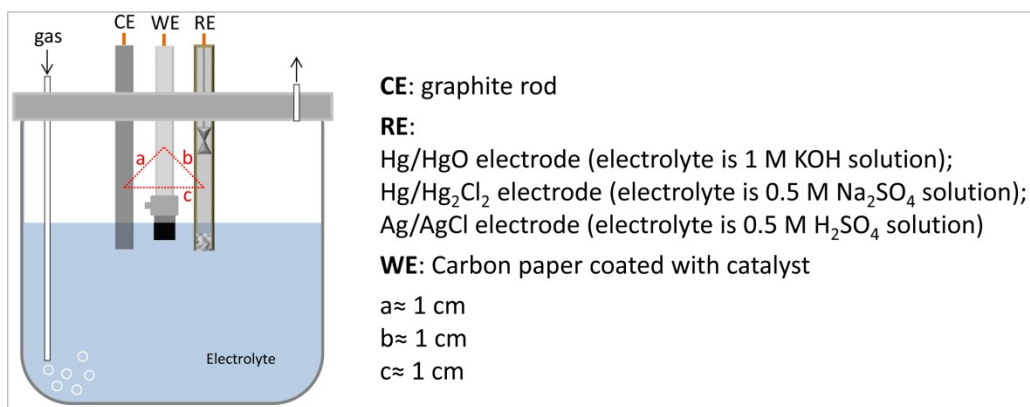

**Figure S1.** Schematic diagram of electrochemical experiment device

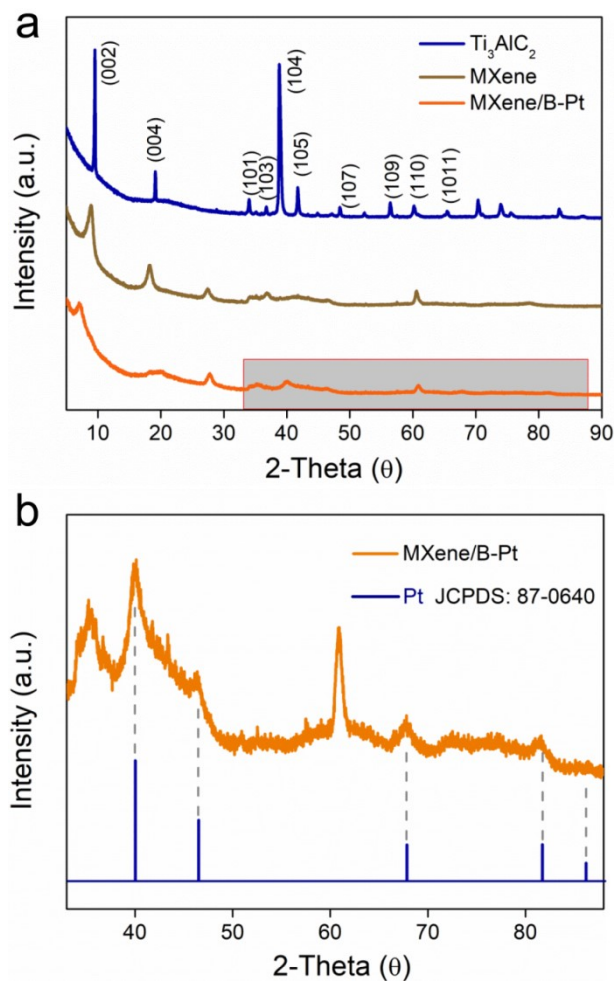

**Figure S2** (a) XRD signals of  $Ti_3AlC_2$ , MXene, and MXene/B-Pt; (b) Local amplification of the XRD signal of MXene/B-Pt.

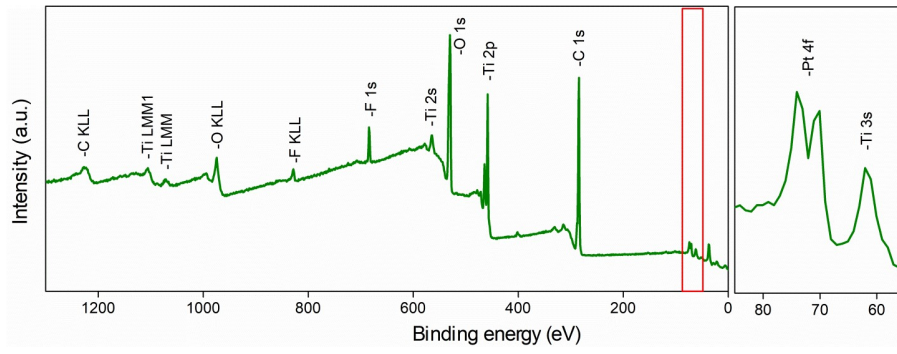

**Figure S3** XPS signal (full spectrum) of MXene/B-Pt.

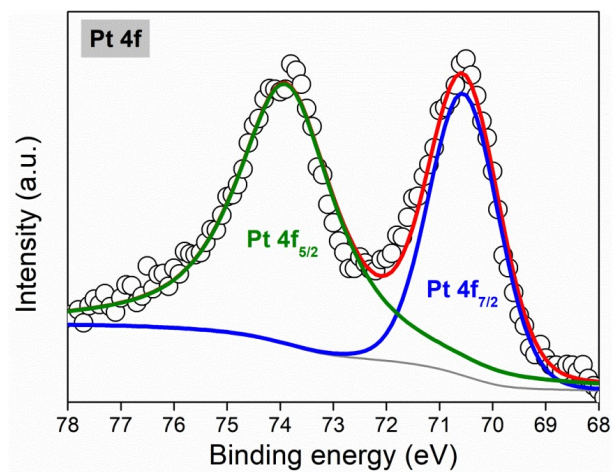

**Figure S4** XPS signal (fine spectrum of Pt element) of MXene/B-Pt.

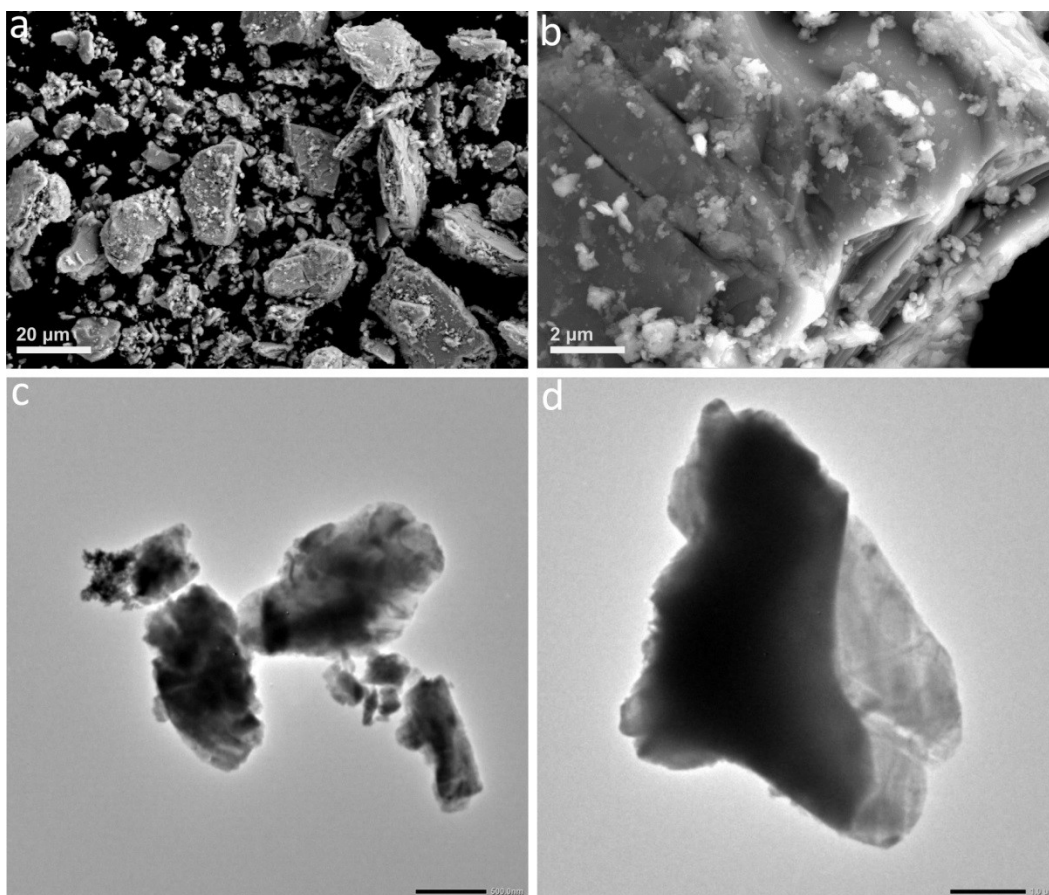

**Figure S5** (a-b) SEM images of  $\text{Ti}_3\text{AlC}_2$ ; (c-d) TEM images of  $\text{Ti}_3\text{AlC}_2$ .

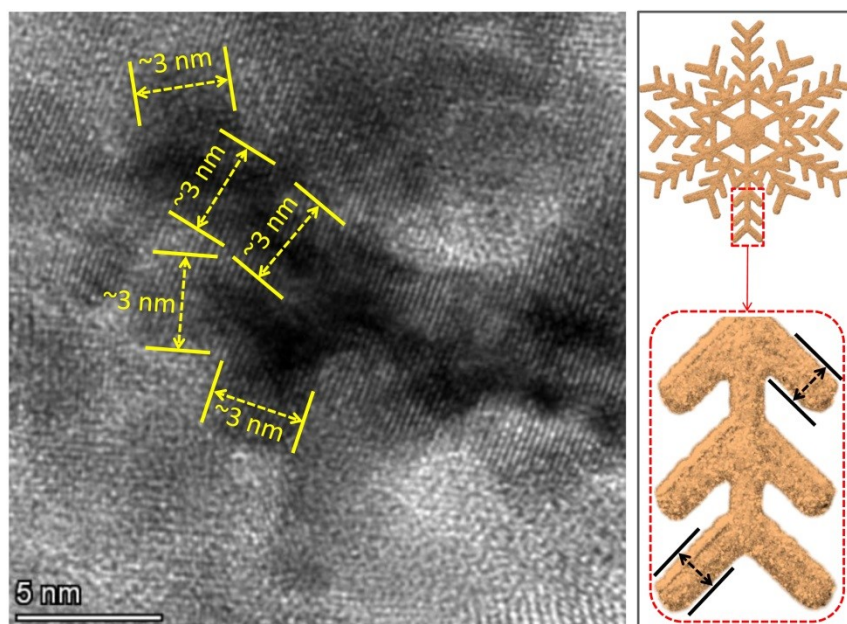

**Figure S6.** The branch width of the snowflake-like Pt nanoparticles is about 3 nm.



| <b>Table S1. Overpotentials of MXene/B-Pt with other recently reported Pt-based HER catalysts. (1 M KOH)</b> |                    |                                        |                                                                |
|--------------------------------------------------------------------------------------------------------------|--------------------|----------------------------------------|----------------------------------------------------------------|
| <b>Catalyst</b>                                                                                              | <b>Electrolyte</b> | <b><math>\eta_{10}</math><br/>(mV)</b> | <b>Information Sources</b>                                     |
| Pt/CNW@PCN-222                                                                                               | 1 M KOH            | 115                                    | Small, 2020, 16, 2005111                                       |
| Pt@PCM                                                                                                       | 1 M KOH            | 105                                    | Science Advances, 2018, 4, eaao6657                            |
| PtNWs/SL-Ni(OH) <sub>2</sub>                                                                                 | 1 M KOH            | 70                                     | Nature Communications, 2015, 6, 6430                           |
| CDs/Pt PANI                                                                                                  | 1 M KOH            | 56                                     | Applied Catalysis B: Environmental, 2019, 257, 117905          |
| Mo <sub>2</sub> C@NC@Pt                                                                                      | 1 M KOH            | 47                                     | ACS Applied Materials & Interfaces, 2019, 11, 4047-4056        |
| Pt <sub>3</sub> /HMCS                                                                                        | 1 M KOH            | 46.2                                   | Advanced Materials, 2020, 32, 1901349                          |
| Pt on WS <sub>2</sub>                                                                                        | 1 M KOH            | 45                                     | Advanced Materials, 2018, 30, 1704779                          |
| PtCoFe@CN                                                                                                    | 1 M KOH            | 45                                     | ACS Applied Materials & Interfaces, 2017, 9, 3596-3601         |
| Pt/Ni(HCO <sub>3</sub> ) <sub>2</sub>                                                                        | 1 M KOH            | 44                                     | Angewandte Chemie International Edition, 2019, 58, 5432-5437   |
| Pt <sub>3</sub> Ni <sub>2</sub> -NWs/SC                                                                      | 1 M KOH            | 42                                     | Nature Communications, 2017, 8, 14580                          |
| NiOx/Pt <sub>3</sub> Ni                                                                                      | 1 M KOH            | 40                                     | Angewandte Chemie International Edition, 2016, 55, 12859       |
| Pt1/NMHCS                                                                                                    | 1 M KOH            | 40                                     | Advanced Materials, 2021, 2008599                              |
| PtNi-O/C                                                                                                     | 1 M KOH            | 39.8                                   | Journal of the American Chemical Society, 2018, 140, 9046-9050 |
| Pt/OLC                                                                                                       | 1 M KOH            | 38                                     | Nature Energy, 2019, 4, 512-518                                |
| Pt/NiO@Ni/NF                                                                                                 | 1 M KOH            | 34                                     | ACS Catalysis, 2018, 18, 8866-8872                             |
| A-CoPt-NC                                                                                                    | 1 M KOH            | 32                                     | Angewandte Chemie International Edition, 2019, 58, 9404        |
| C Pt@ZIF-67                                                                                                  | 1 M KOH            | 32                                     | Journal of Materials Chemistry A, 2018, 6, 1376-1381           |
| Pt/GHSs                                                                                                      | 1 M KOH            | 27                                     | Small Structures, 2021, 2, 2000017                             |
| Pt/MBOPs                                                                                                     | 1 M KOH            | 22.8                                   | Journal of Materials Chemistry A, 2020, 8, 7171                |
| Pd/Cu-Pt                                                                                                     | 1 M KOH            | 22.8                                   | Angewandte Chemie International Edition, 2017, 56, 16047       |
| <b>MXene/B-Pt</b>                                                                                            | <b>1 M KOH</b>     | <b>20</b>                              | <b>This Work</b>                                               |

**Table S2.** Overpotentials of MXene/B-Pt with other recently reported Pt-based HER catalysts (in acid medium).

| Catalyst                                                             | Electrolyte                            | $\eta_{10}$<br>(mV) | Information Sources                         |
|----------------------------------------------------------------------|----------------------------------------|---------------------|---------------------------------------------|
| PEDOT-g-PAA/Pt 15s                                                   | 0.5 M H <sub>2</sub> SO <sub>4</sub>   | 190                 | ACS Appl. Energy Mater., 2019, 2, 1436      |
| Pt/3D sulfur-doped graphene                                          | 0.5 M H <sub>2</sub> SO <sub>4</sub>   | 112                 | Int. J. Hydrogen Energy, 2018, 43, 23231    |
| Ti <sub>3</sub> C <sub>2</sub> T <sub>x</sub> @Pt/SWCNTs             | 0.5 M H <sub>2</sub> SO <sub>4</sub>   | 104                 | Adv. Funct. Mater., 2020, 30, 2000693       |
| Pt/NaTiO                                                             | 0.1 M HClO <sub>4</sub>                | ~75                 | J. Mater. Chem. A, 2020, 8, 16582           |
| Pt-MoO <sub>3-x</sub> nanoflakes  MoS <sub>2</sub>                   | 0.5 M H <sub>2</sub> SO <sub>4</sub>   | 69                  | J. Catal., 2020, 381, 1                     |
| S-M-5Pt                                                              | 0.5 M H <sub>2</sub> SO <sub>4</sub>   | 62                  | Adv. Funct. Mater., 2020, 30, 2000693       |
| TBA-Ti <sub>3</sub> C <sub>2</sub> T <sub>x</sub> -Pt-20             | 0.5 M H <sub>2</sub> SO <sub>4</sub>   | 55                  | ACS Sustainable Chem. Eng., 2019, 7, 4266   |
| Pt/graphene film                                                     | 0.5 M H <sub>2</sub> SO <sub>4</sub>   | 52                  | ACS Sustainable Chem. Eng., 2019, 7, 11721  |
| CoPt@ZIF-67                                                          | 0.5 M H <sub>2</sub> SO <sub>4</sub>   | 50                  | J. Mater. Chem. A, 2019, 7, 6543            |
| 10Pt@high proportion polyaniline doped bacterial cellulose           | 0.5 M H <sub>2</sub> SO <sub>4</sub>   | 47                  | Int. J. Hydrogen Energy, 2018, 43, 6167     |
| Pt/defective WO <sub>3</sub> @CFC                                    | 0.5 M H <sub>2</sub> SO <sub>4</sub>   | 42                  | J. Mater. Chem. A, 2019, 7, 6285            |
| LPWGA with WO <sub>3-x</sub> -Pt                                     | 0.5 M H <sub>2</sub> SO <sub>4</sub>   | 42                  | Small, 2021, DOI: 10.1002/smll.202102159    |
| Pt-WO <sub>3</sub>                                                   | 0.5 M H <sub>2</sub> SO <sub>4</sub>   | 39                  | Nano Energy, 2020, 71, 104653               |
| Pt single atom/mesoporous WO <sub>3-x</sub>                          | 0.5 M H <sub>2</sub> SO <sub>4</sub>   | 38                  | Angew. Chem. Int. Ed., 2019, 58, 16038      |
| Pt-carbon quantum dots-co-loaded                                     | 0.5 M H <sub>2</sub> SO <sub>4</sub>   | 38                  | J. Power Sources, 2020, 451, 227770         |
| Pt-TiO <sub>2-x</sub> nanosheets                                     | 0.5 M H <sub>2</sub> SO <sub>4</sub>   | 35                  | Nanoscale, 2020, 12, 11055                  |
| Pt-FeNi@ porous graphene shells                                      | 0.5 M H <sub>2</sub> SO <sub>4</sub>   | ~35                 | J. Mater. Chem. A, 2019, 7, 24347           |
| Mo <sub>2</sub> TiC <sub>2</sub> T <sub>x</sub> -VMo                 | 0.5 M H <sub>2</sub> SO <sub>4</sub>   | 30                  | Nature Catalysis                            |
| carbon dots-Pt modified polyaniline nanosheets grown on carbon cloth | 0.5 M H <sub>2</sub> SO <sub>4</sub>   | 30                  | Appl. Catal., B, 2019, 257, 117905          |
| Mo <sub>2</sub> C@NC@Pt                                              | 0.5 M H <sub>2</sub> SO <sub>4</sub>   | 27                  | ACS Appl. Mater. Interfaces, 2019, 11, 4047 |
| Pt-WC1,10/Zn-Co-ZIFs                                                 | 0.5 M H <sub>2</sub> SO <sub>4</sub>   | 23                  | Electrochim. Acta, 2019, 328, 135077        |
| <b>MXene/B-Pt</b>                                                    | <b>0.5 H<sub>2</sub>SO<sub>4</sub></b> | <b>14</b>           | <b>This Work</b>                            |
